# Supplementary material
Source: PubMed Central journal article supplement (PMC6827114)
Supplement: Supplemental1_material.pdf [file Supplemental1_material.pdf]

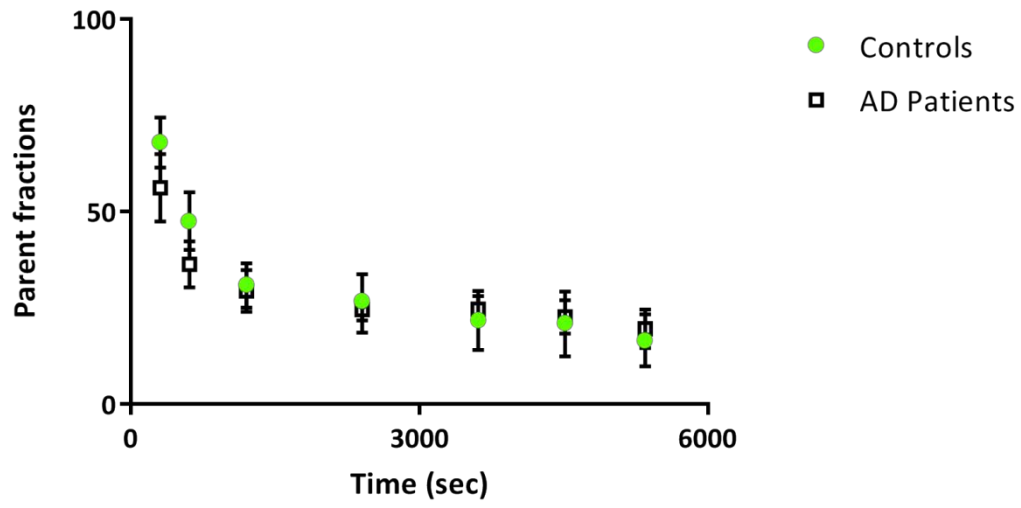

Supplementary figure 1. Parent fractions (mean  $\pm$  SD) for AD patients and controls separately.

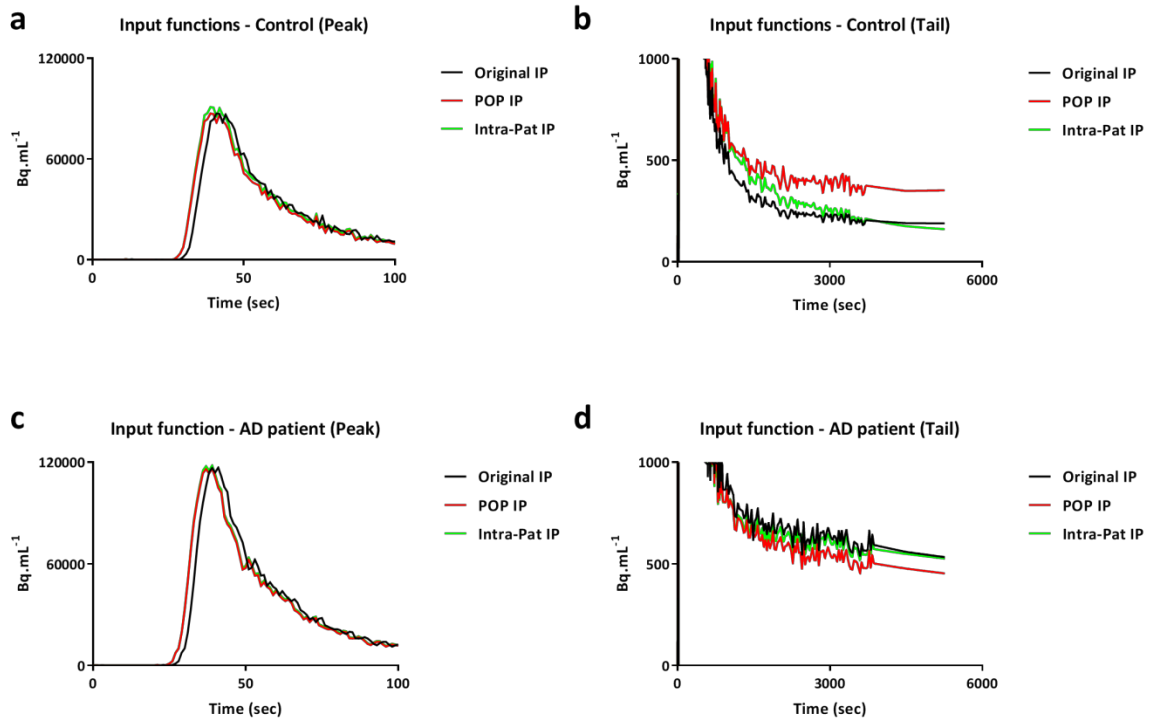

**Supplementary figure 2.** Three metabolite corrected plasma input functions (Original IP, POP IP, and Intra-Pat IP) for a representative control (**a**: peak, **b**: tail) and an AD patient (**c**: peak, **d**: tail). Original IP is the input function obtained using original parent fractions; POP IP is the input function obtained using population average parent fractions; Intra-pat IP is the input function obtained using intra subject average (test-retest) parent fractions.
